# Supplementary material for: Oxidation of thiocyanate with H2O2 catalyzed by [RuIII(edta)(H2O)]−
Source: Royal Society of Chemistry journal article supplement (doi:10.1039/c3dt50723h), 2013-01-01
Supplement: c3dt50723h.pdf [file c3dt50723h.pdf]

## Electronic Supporting Information

### Oxidation of thiocyanate with $\text{H}_2\text{O}_2$ catalyzed by $[\text{Ru}^{\text{III}}(\text{edta})(\text{H}_2\text{O})]^{-\dagger}$

Debabrata Chatterjee,\* Barnali Paul and Rupa Mukherjee

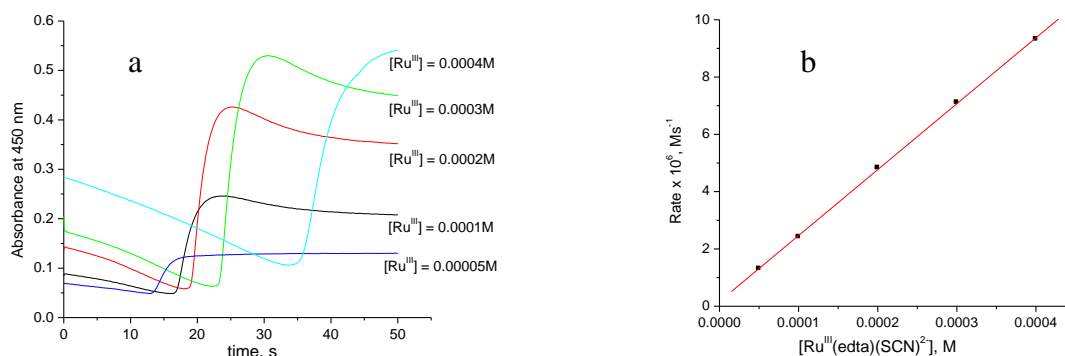

**Figure S1.** (a) Absorption vs. time trace for the oxidation of thiocyanate with  $\text{H}_2\text{O}_2$  at varied  $[\text{Ru}^{\text{III}}(\text{edta})(\text{SCN})]^{2-}$  concentration and (b) plot of rate vs.  $[\text{Ru-complex}]$  at, pH 4.3 (1 mM acetate buffer) and 25 °C.  $[\text{H}_2\text{O}_2] = 20$  mM

**Table S1** Rate data (used in **Figure S1b**) estimated from **Figure S1a** at varied  $[\text{Ru}^{\text{III}}]$

| $[\text{Ru}^{\text{III}}]$ , M | $10^6$ Rate, $\text{Ms}^{-1}$ |
|--------------------------------|-------------------------------|
| $5 \times 10^{-5}$ M           | $1.31 \pm 0.02$               |
| $1 \times 10^{-4}$ M           | $2.42 \pm 0.02$               |
| $2 \times 10^{-4}$ M           | $4.83 \pm 0.04$               |
| $3 \times 10^{-4}$ M           | $7.11 \pm 0.04$               |
| $4 \times 10^{-4}$ M           | $9.32 \pm 0.05$               |

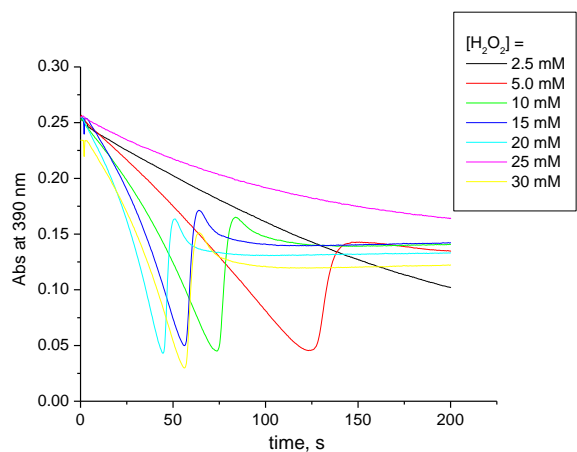

**Figure S2.** Time vs. absorption trace for the oxidation of thiocyanate with at varied [H<sub>2</sub>O<sub>2</sub>] at 25 °C. [Ru] = 2.5 x 10<sup>-4</sup> M , [SCN<sup>-</sup>] = 2.5 x 10<sup>-4</sup> M, pH 4.3 (1 mM acetate buffer)

**Table S2** Rate data (estimated from **Figure S2**) at various H<sub>2</sub>O<sub>2</sub> concentration

| [H <sub>2</sub> O <sub>2</sub> ], M | Rate, M s <sup>-1</sup>           |
|-------------------------------------|-----------------------------------|
| 2.5 x 10 <sup>-3</sup>              | (0.24 ± 0.004) x 10 <sup>-6</sup> |
| 5.0 x 10 <sup>-3</sup>              | (0.67 ± 0.006) x 10 <sup>-6</sup> |
| 1.0 x 10 <sup>-2</sup>              | (2.19 ± 0.02) x 10 <sup>-6</sup>  |
| 1.5 x 10 <sup>-2</sup>              | (3.73 ± 0.02) x 10 <sup>-6</sup>  |
| 2.0 x 10 <sup>-2</sup>              | (5.19 ± 0.03) x 10 <sup>-6</sup>  |
| 2.5 x 10 <sup>-2</sup>              | (7.11 ± 0.03) x 10 <sup>-6</sup>  |
| 3.0 x 10 <sup>-2</sup>              | (8.61 ± 0.04) x 10 <sup>-6</sup>  |

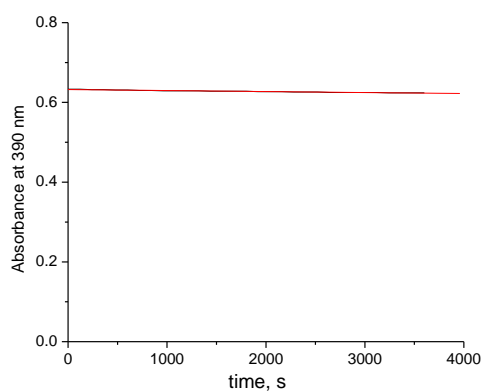

**Figure S3.** Time vs. absorption trace for the reaction of  $\text{SCN}^-$  (0.02M) with  $[\text{Ru}^{\text{V}}(\text{edta})\text{O}]^-$  (preformed by reacting  $[\text{Ru}^{\text{III}}(\text{edta})(\text{H}_2\text{O})]^-$  and  $\text{H}_2\text{O}_2$ ) at 25 °C and pH = 4.3.  $[\text{Ru}^{\text{III}}] = 1.0 \times 10^{-4}$  M,  $[\text{H}_2\text{O}_2] = 1.0 \times 10^{-4}$  M,  $[\text{SCN}^-] = 0.02$  M.

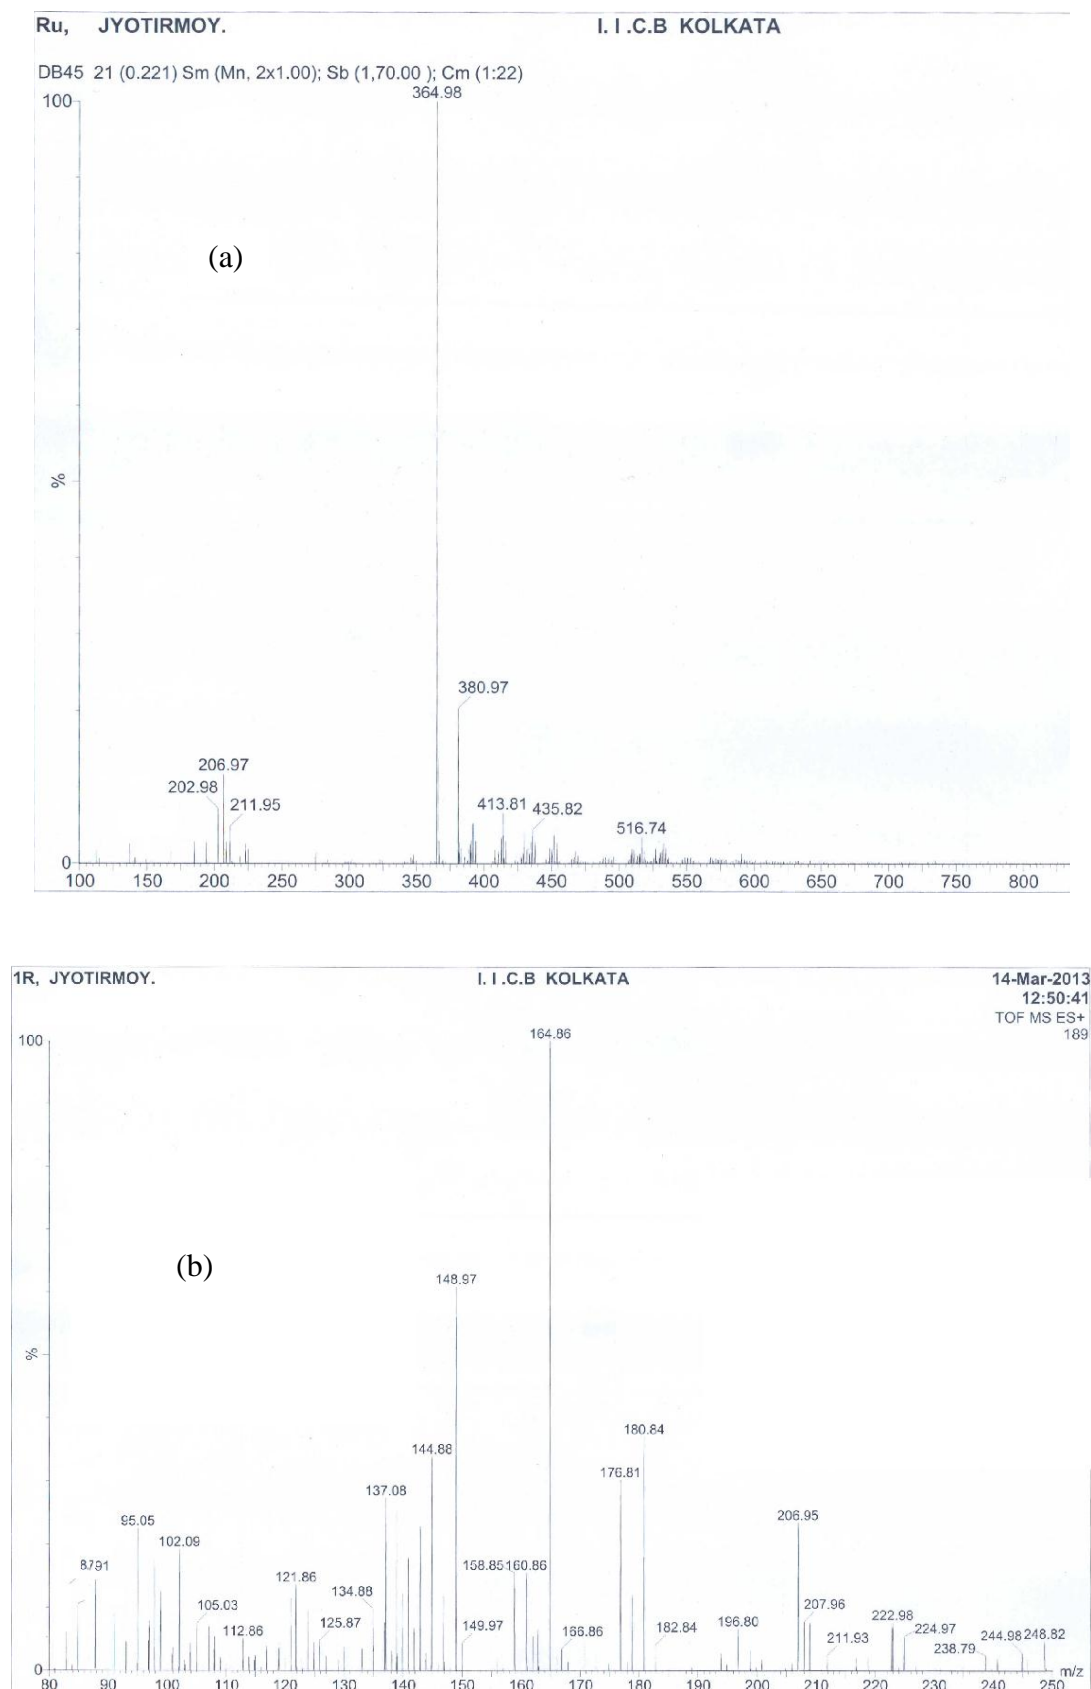

**Figure S4.** Results of ESI-MS studies for the oxidation of  $\text{SCN}^-$  by the  $\text{Ru}(\text{edta})/\text{H}_2\text{O}_2$  system. (a) Reaction mixture was analyzed just after disappearance of the red colour (after 200 sec) and b) after 1 h.  $[\text{Ru}(\text{edta})(\text{H}_2\text{O})] = 2.0 \times 10^{-4} \text{ M}$ ,  $[\text{SCN}^-] = 2 \times 10^{-3} \text{ M}$ ,  $[\text{H}_2\text{O}_2] = 2 \times 10^{-2} \text{ M}$ ,  $\text{pH} = 4.3$  adjusted by  $(\text{NaOH}/\text{HClO}_4)$ .

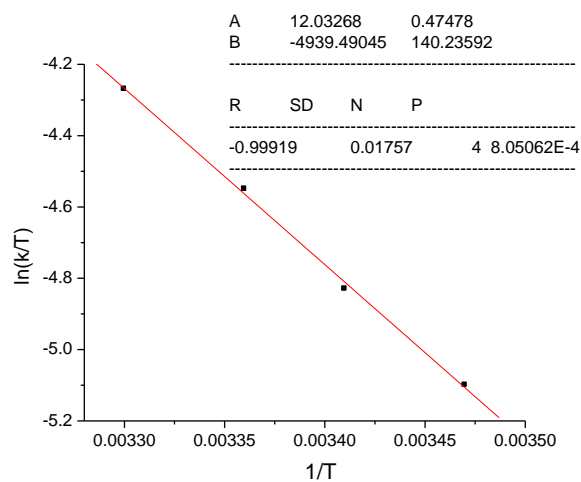

**Figure S5.** Eyring plot for the oxidation of  $\text{SCN}^-$  by the  $\text{Ru}(\text{edta})/\text{H}_2\text{O}_2$  system for at pH 4.3.

**Table S3** Rate data (for **Figure S5**) at various temperature

| Temp / °C | k, M <sup>-1</sup> s <sup>-1</sup> |
|-----------|------------------------------------|
| 15        | 1.78 ± 0.02                        |
| 20        | 2.33 ± 0.03                        |
| 25        | 3.11 ± 0.04                        |
| 30        | 4.23 ± 0.04                        |

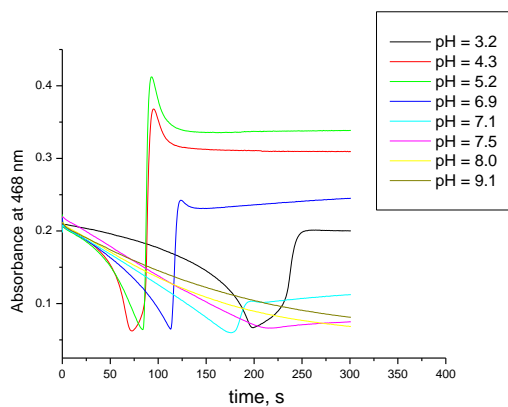

**Figure S6.** Effect of pH on the time vs. absorption trace for the oxidation of thiocyanate with at 25 °C. [Ru] = 2.5 x 10<sup>-4</sup> M, [SCN<sup>-</sup>] = 5 x 10<sup>-4</sup> M, [H<sub>2</sub>O<sub>2</sub>] = 20 mM

**Table S4**                      Rate data (estimated from **Figure S6**) at various pH

| pH  | Rate x 10 <sup>6</sup> , M s <sup>-1</sup> |
|-----|--------------------------------------------|
| 3.4 | 1.12 ± 0.04                                |
| 4.3 | 3.71 ± 0.05                                |
| 5.2 | 3.68 ± 0.06                                |
| 5.6 | 3.24 ± 0.06                                |
| 6.2 | 2.47 ± 0.05                                |
| 6.7 | 1.44 ± 0.04                                |
| 7.1 | 0.85 ± 0.03                                |
| 7.5 | 0.74 ± 0.03                                |
| 8.1 | 0.46 ± 0.02                                |
